# Supplementary material for: Multitask Learning with Convolutional Neural Networks and Vision Transformers Can Improve Outcome Prediction for Head and Neck Cancer Patients
Source: MDPI journal article supplement (doi:10.3390/cancers15194897), 2023-10-09
Supplement: s1 [file s1]

# Supplementary Materials: Multitask Learning with Convolutional Neural Networks and Vision Transformers Can Improve Outcome Prediction for Head and Neck Cancer Patients

**Table S1.** Patient characteristics of the exploratory and independent validation cohort of the DKTK dataset: *P*-values were obtained using two-sided Mann-Whitney U-tests for continuous variables and  $\chi^2$  homogeneity tests for categorical variables.

| Variable                                        | Exploratory cohort (n=205) |               | Independent validation cohort (n=85) |               | <i>p</i> -value |
|-------------------------------------------------|----------------------------|---------------|--------------------------------------|---------------|-----------------|
|                                                 | Median                     | (range)       | Median                               | (range)       |                 |
| Follow up time of patients alive (months)       | 53                         | (4–132)       | 43                                   | (8–107)       | 0.72            |
| Observed loco-regional recurrence time (months) | 8                          | (1–128)       | 9                                    | (2–32)        | 0.99            |
| Primary tumor volume (cm <sup>3</sup> )         | 29.13                      | (4.52–321.74) | 40.62                                | (2.70–239.07) | 0.038           |
| Age (years)                                     | 59.00                      | (39.20–84.50) | 55.00                                | (37.00–76.00) | 0.025           |
|                                                 | Number of patients         | (%)           | Number of patients                   | (%)           |                 |
| Observed loco-regional tumor recurrence         | 83                         | (40)          | 28                                   | (33)          | 0.28            |
| Gender                                          |                            |               |                                      |               |                 |
| male/female                                     | 173/32                     | (84/16)       | 74/11                                | (87/13)       | 0.69            |
| cT-stage                                        |                            |               |                                      |               |                 |
| T1/T2/T3/T4                                     | 2/23/50/130                | (1/11/25/63)  | 2/9/30/44                            | (2/11/35/52)  | 0.19            |
| cN-stage                                        |                            |               |                                      |               |                 |
| N0/N1/N2/N3/unknown                             | 30/7/153/15/0              | (15/3/75/7/0) | 9/8/64/3/1                           | (11/9/75/4/1) | 0.069           |
| UICC-stage                                      |                            |               |                                      |               |                 |
| I/II/III/IV                                     | 0/0/15/190                 | (0/0/7/93)    | 1/2/9/73                             | (1/2/11/86)   | 0.040           |
| Tumor site                                      |                            |               |                                      |               |                 |
| oropharynx/oral cavity/hypopharynx/larynx       | 93/50/62/0                 | (45/25/30/0)  | 29/23/28/5                           | (34/27/33/6)  | 0.003           |
| p16 status                                      |                            |               |                                      |               |                 |
| negative/positive/unknown                       | 147/28/30                  | (72/13/15)    | 52/5/28                              | (61/6/33)     | 0.25            |
| Pathological grading                            |                            |               |                                      |               |                 |
| 0/1/2/3/unknown                                 | 1/6/131/60/7               | (1/3/64/29/3) | 0/0/43/35/7                          | (0/0/51/41/8) | 0.063           |
| Smoking status                                  |                            |               |                                      |               |                 |
| no/yes/unknown                                  | 40/163/2                   | (20/79/1)     | 13/51/21                             | (15/60/25)    | 1.00            |
| Alcohol consumption                             |                            |               |                                      |               |                 |
| no/yes/unknown                                  | 62/85/58                   | (30/41/29)    | 23/25/37                             | (27/29/44)    | 0.60            |

**Table S2.** CT image acquisition parameters of the exploratory and independent validation cohort of the DTK dataset.

| Variable                   | Exploratory cohort (n=205) |                | Independent validation cohort (n=85) |              |
|----------------------------|----------------------------|----------------|--------------------------------------|--------------|
|                            | Median                     | (range)        | Median                               | (range)      |
| Exposure time (ms)         | 1000                       | (500–1000)     | 500                                  | (500–750)    |
| Exposure (mAs)             | 146                        | (31–300)       | 61                                   | (22–150)     |
| Tube current (mA)          | 162                        | (32–440)       | 183                                  | (68–438)     |
|                            | Number of patients         | (%)            | Number of patients                   | (%)          |
| Manufacturer               |                            |                |                                      |              |
| Siemens/GE/Philips/unknown | 72/31/20/82                | 35/15/10/40    | 66/14/0/5                            | 78/16/0/6    |
| Spacing z (mm)             |                            |                |                                      |              |
| 2/2.5/3/3.75/5             | 20/22/63/1/99              | 10/11/30/1/48  | 0/0/27/0/58                          | 0/0/32/0/68  |
| Spacing x/y (mm)           |                            |                |                                      |              |
| <0.98/0.98/1.17/1.27/1.37  | 20/110/20/26/29            | 10/53/10/13/14 | 0/13/0/14/58                         | 0/15/0/17/68 |
| Kilovoltage peak (keV)     |                            |                |                                      |              |
| 120/130/140/unknown        | 97/2/18/88                 | 47/1/9/43      | 66/0/0/19                            | 78/0/0/22    |
| Reconstruction kernel      |                            |                |                                      |              |
| B                          | 20                         | 10             | 0                                    | 0            |
| B10s                       | 0                          | 0              | 1                                    | 1            |
| B20f                       | 3                          | 1              | 52                                   | 62           |
| B20s                       | 0                          | 0              | 1                                    | 1            |
| B30f                       | 2                          | 1              | 0                                    | 0            |
| B30s                       | 27                         | 13             | 0                                    | 0            |
| B31f                       | 0                          | 0              | 12                                   | 14           |
| B31s                       | 20                         | 10             | 0                                    | 0            |
| B40f                       | 1                          | 1              | 0                                    | 0            |
| B40s                       | 0                          | 0              | 0                                    | 0            |
| STANDARD                   | 23                         | 11             | 0                                    | 0            |
| 59.10.AB50                 | 18                         | 9              | 0                                    | 0            |
| unknown                    | 91                         | 44             | 19                                   | 22           |

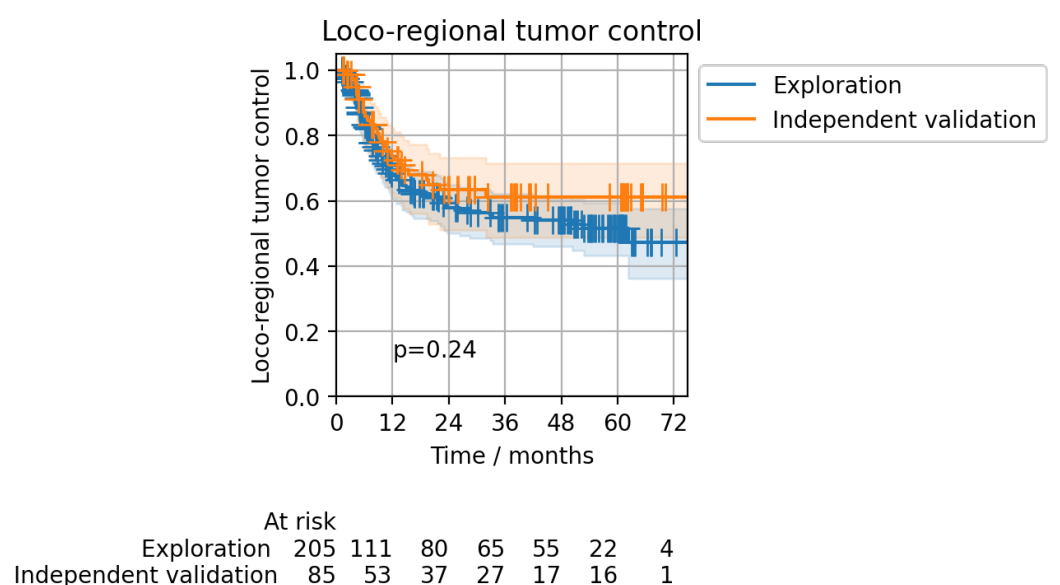**Figure S1.** A comparison of the Kaplan-Meier estimates for the endpoint loco-regional tumor control between the exploration and independent validation cohort of the DTK data. The *p*-value of the log-rank test for differences between both functions is reported as well.

**Table S3.** Patient characteristics of the HECKTOR2021 cohort.

| Variable                                    | HECKTOR2021 Cohort (n = 224) |                 |
|---------------------------------------------|------------------------------|-----------------|
|                                             | Median                       | (Range)         |
| Age (years)                                 | 63                           | (34–90)         |
| Primary tumor volume (cm <sup>3</sup> )     | 8.26                         | (0.57–186.44)   |
| Follow-up time without progression (months) | 43                           | (22–101)        |
| Observed progression time (months)          | 16                           | (3–63)          |
|                                             | Number of Patients           | (%)             |
| Observed progression                        | 56                           | (25)            |
| Gender                                      |                              |                 |
| male/female                                 | 167 / 57                     | (75 / 25)       |
| cT-stage                                    |                              |                 |
| T1/T2/T3/T4/unknown                         | 26/94/58/45/1                | (12/42/26/20/0) |
| cN-stage                                    |                              |                 |
| N0/N1/N2/N3                                 | 33/26/150/15                 | (15/12/66/7)    |
| UICC-stage                                  |                              |                 |
| I/II/III/IV                                 | 4/19/29/172                  | (2/8/13/77)     |
| HPV status                                  |                              |                 |
| negative/positive/unknown                   | 30/84/110                    | (13/38/49)      |
| Smoking status                              |                              |                 |
| no/yes/unknown                              | 5/18/201                     | (2/8/90)        |
| Alcohol consumption                         |                              |                 |
| no/yes/unknown                              | 11/12/201                    | (5/5/90)        |
| Chemotherapy                                |                              |                 |
| no/yes                                      | 27/197                       | (12/88)         |

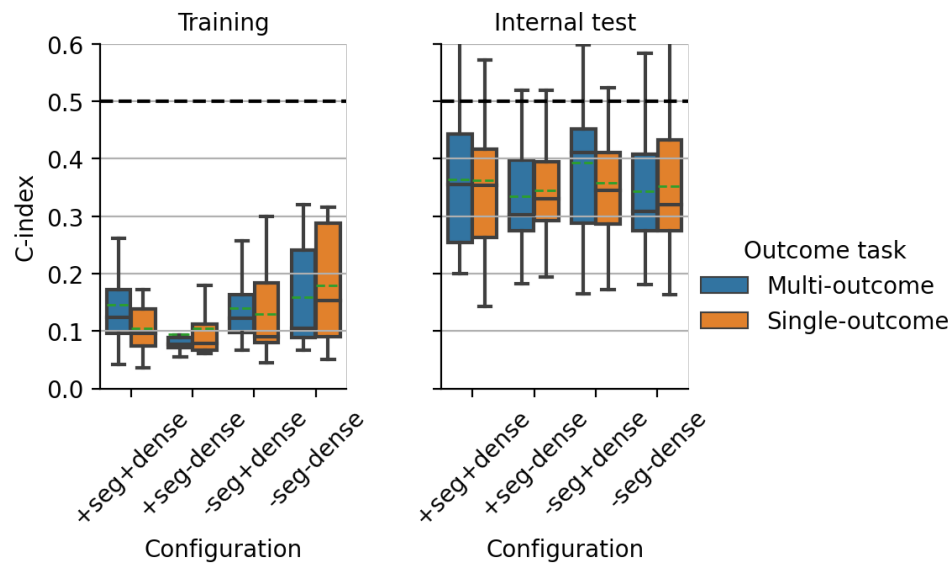

(a) CNN model performance

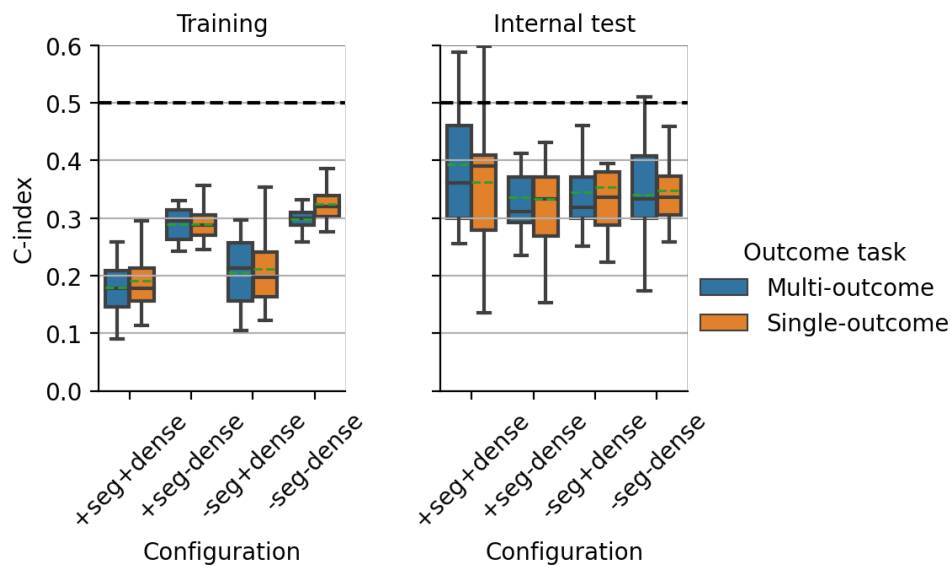

(b) ViT model performance

**Figure S2.** CPH head: cross-validation performance comparison between all investigated configurations of multi- and single-outcome models as measured by the concordance index. Model predictions are shown based on the 15 models trained during cross-validation for the endpoint progression-free survival on the HECKTOR2021 challenge training dataset using pre-treatment PET/CT imaging data. 'seg' refers to incorporating an auxiliary segmentation loss, while 'dense' indicates the usage of an additional DenseNet branch. + and - signs denote presence and absence of a part of the architecture, respectively. The dashed horizontal line indicates a C-index of 0.5, which would be achieved by models making random predictions. Green dashed lines denote distribution means.

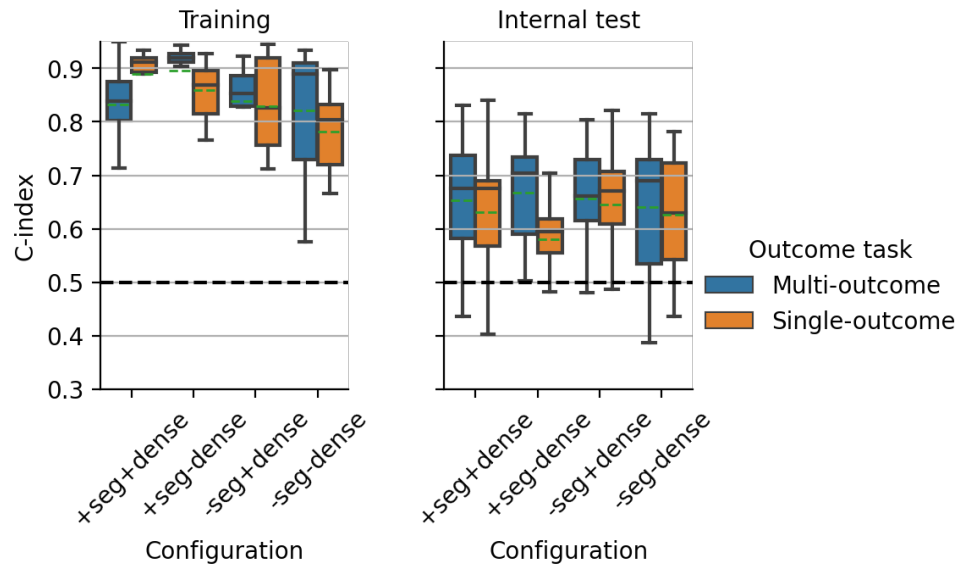

(a) CNN model performance

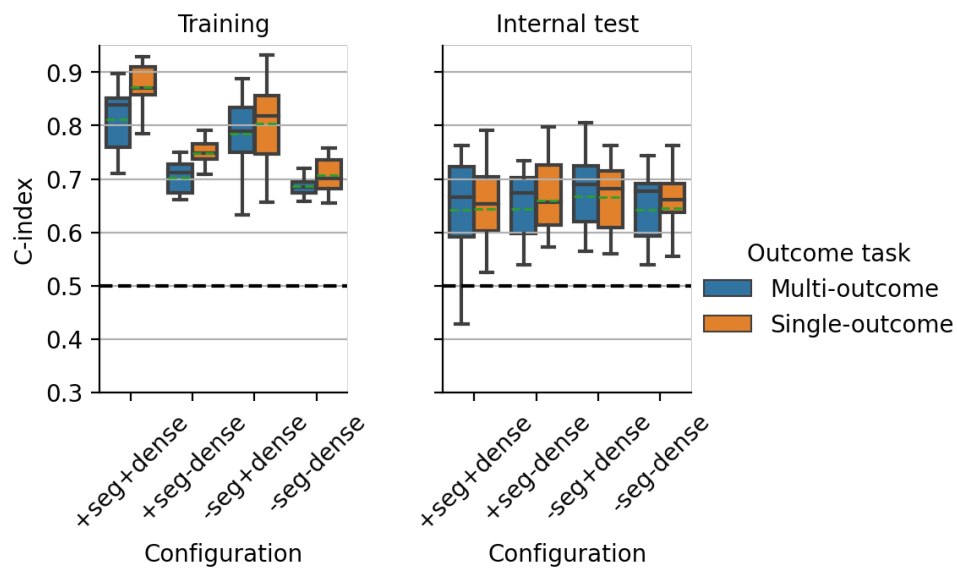

(b) ViT model performance

**Figure S3.** Gensheimer head (24 months): cross-validation performance comparison between all investigated configurations of multi- and single-outcome models as measured by the concordance index. Model predictions are shown based on the 15 models trained during cross-validation for the endpoint progression-free survival on the HECKTOR2021 challenge training dataset using pre-treatment PET/CT imaging data. 'seg' refers to incorporating an auxiliary segmentation loss, while 'dense' indicates the usage of an additional DenseNet branch. + and – signs denote presence and absence of a part of the architecture, respectively. The dashed horizontal line indicates a C-index of 0.5, which would be achieved by models making random predictions. Green dashed lines denote distribution means.

**Table S4.** Discriminative performance as measured by the concordance index for model ensembles for the prediction of progression-free survival on the HECKTOR2021 training dataset using multitask CNN and ViT models. A \* identifies statistically significant stratifications of the ensemble model on the internal test data (log-rank  $p < 0.05$ ). Values in parentheses denote 95% confidence intervals as computed by the ‘concordance.index’ function from the R package ‘survcomp’. Best internal test performances for both outcome heads are marked in bold, separately for CNNs and ViTs.

| Configuration            |       | Head     | CNN              |                          | ViT              |                          |
|--------------------------|-------|----------|------------------|--------------------------|------------------|--------------------------|
| Seg                      | Dense |          | Training         | IT                       | Training         | IT                       |
| Multi-outcome (CPH + GH) |       |          |                  |                          |                  |                          |
| ✓                        | ✓     | CPH      | 0.07 (0.05–0.10) | 0.33* (0.26–0.41)        | 0.12 (0.08–0.17) | 0.35* (0.26–0.43)        |
|                          |       | GH (24m) | 0.90 (0.86–0.93) | 0.69* (0.61–0.76)        | 0.86 (0.82–0.91) | 0.68* (0.60–0.75)        |
| ✓                        | ✗     | CPH      | 0.06 (0.04–0.09) | <b>0.29* (0.22–0.36)</b> | 0.26 (0.20–0.32) | 0.37* (0.30–0.44)        |
|                          |       | GH (24m) | 0.94 (0.92–0.97) | <b>0.71* (0.65–0.78)</b> | 0.72 (0.66–0.78) | 0.64* (0.57–0.72)        |
| ✗                        | ✓     | CPH      | 0.08 (0.05–0.10) | 0.32* (0.25–0.39)        | 0.13 (0.09–0.18) | <b>0.31* (0.24–0.39)</b> |
|                          |       | GH (24m) | 0.90 (0.86–0.94) | 0.67* (0.60–0.75)        | 0.86 (0.82–0.91) | <b>0.69* (0.62–0.76)</b> |
| ✗                        | ✗     | CPH      | 0.07 (0.04–0.10) | 0.31* (0.24–0.38)        | 0.28 (0.21–0.34) | 0.41 (0.33–0.48)         |
|                          |       | GH (24m) | 0.94 (0.92–0.96) | 0.66 (0.59–0.73)         | 0.70 (0.63–0.76) | 0.64* (0.57–0.71)        |
| Single-outcome (CPH)     |       |          |                  |                          |                  |                          |
| ✓                        | ✓     | CPH      | 0.07 (0.05–0.10) | 0.33* (0.25–0.41)        | 0.13 (0.09–0.17) | 0.37* (0.29–0.45)        |
| ✓                        | ✗     | CPH      | 0.06 (0.04–0.08) | 0.35* (0.27–0.42)        | 0.28 (0.21–0.34) | 0.38 (0.31–0.45)         |
| ✗                        | ✓     | CPH      | 0.05 (0.04–0.07) | 0.37 (0.29–0.45)         | 0.13 (0.08–0.17) | 0.35* (0.27–0.44)        |
| ✗                        | ✗     | CPH      | 0.08 (0.05–0.11) | 0.31* (0.24–0.37)        | 0.32 (0.26–0.38) | 0.37 (0.30–0.44)         |
| Single-outcome (GH)      |       |          |                  |                          |                  |                          |
| ✓                        | ✓     | GH (24m) | 0.92 (0.89–0.95) | 0.68* (0.61–0.75)        | 0.91 (0.87–0.95) | 0.67* (0.60–0.74)        |
| ✓                        | ✗     | GH (24m) | 0.90 (0.86–0.94) | 0.60 (0.52–0.67)         | 0.78 (0.72–0.83) | 0.65* (0.57–0.72)        |
| ✗                        | ✓     | GH (24m) | 0.91 (0.87–0.94) | 0.67* (0.60–0.74)        | 0.88 (0.85–0.92) | 0.68* (0.62–0.75)        |
| ✗                        | ✗     | GH (24m) | 0.86 (0.81–0.91) | 0.68* (0.61–0.75)        | 0.73 (0.67–0.79) | 0.65* (0.58–0.72)        |

Abbreviations: CNN, convolutional neural network; CPH, Cox proportional hazards model; Dense, DenseNet branch; GH, Gensheimer model; IT, internal test; IV, independent validation; m, months; Seg, segmentation loss; ViT, vision transformer

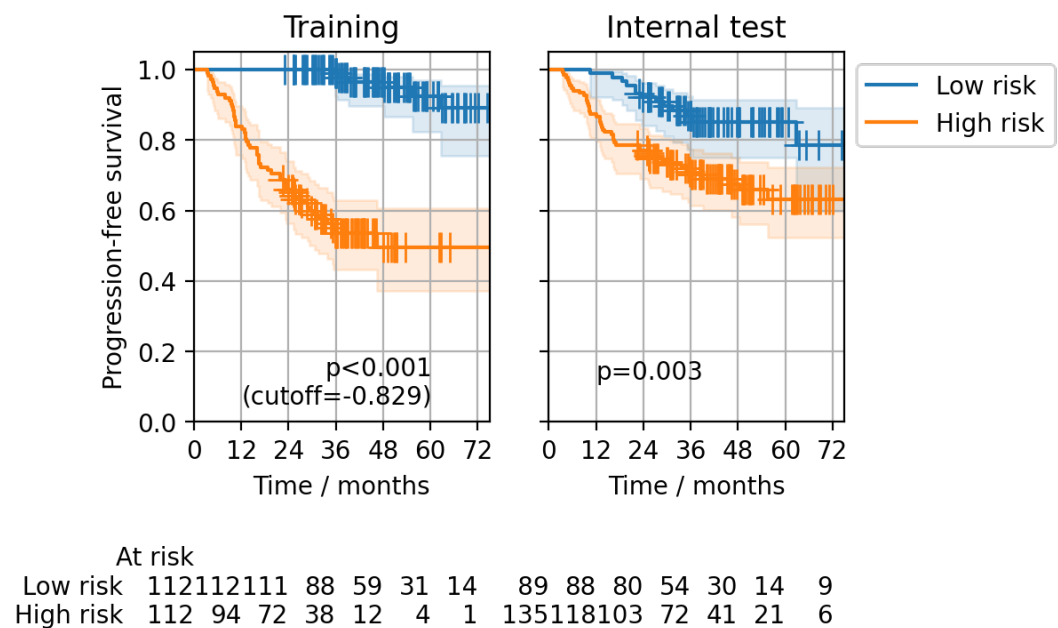

(a) Best-performing CNN: multi-outcome with auxiliary segmentation, without DenseNet branch

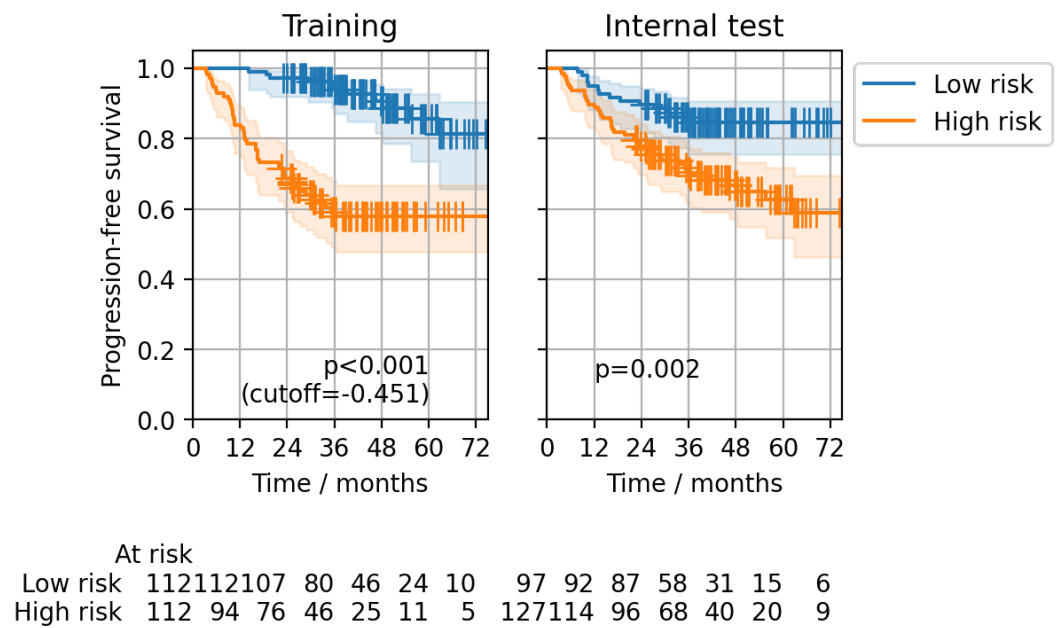

(b) Best-performing ViT: multi-outcome without auxiliary segmentation, with DenseNet branch

**Figure S4.** CPH head: ensemble stratifications obtained for the best-performing CNN and ViT configurations for the training and internal test data of the HECKTOR2021 cohort. Stratifications into low (blue) and high (orange) risk groups of LRC were obtained by using the median prediction on the training data as a cutoff. *P*-values of the log-rank test for differences between the strata’s Kaplan-Meier curves are also provided. Transparently colored regions indicate 95% confidence intervals for the estimated survival functions.

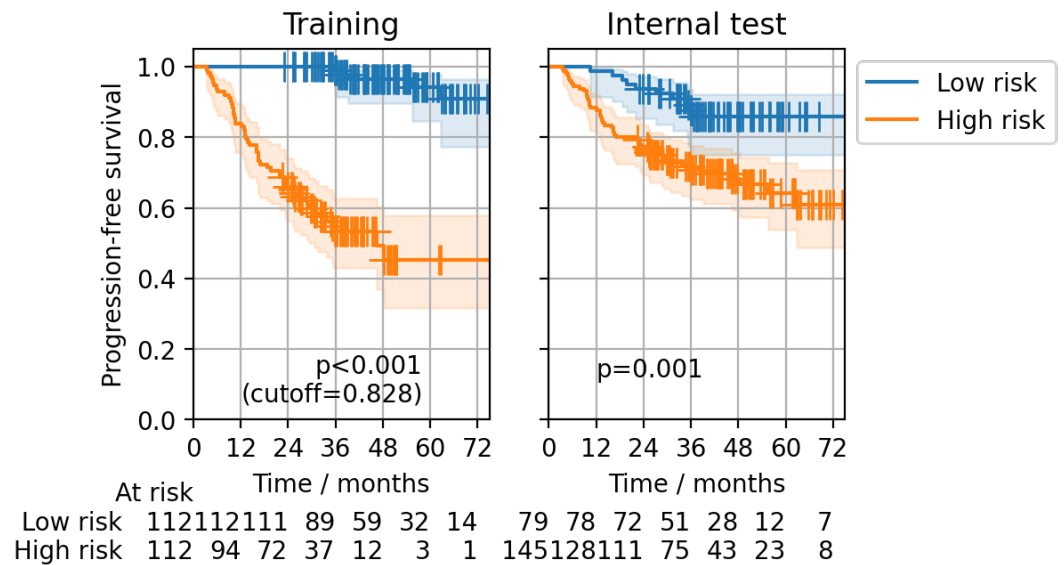

(a) Best-performing CNN: multi-outcome with auxiliary segmentation, without DenseNet branch

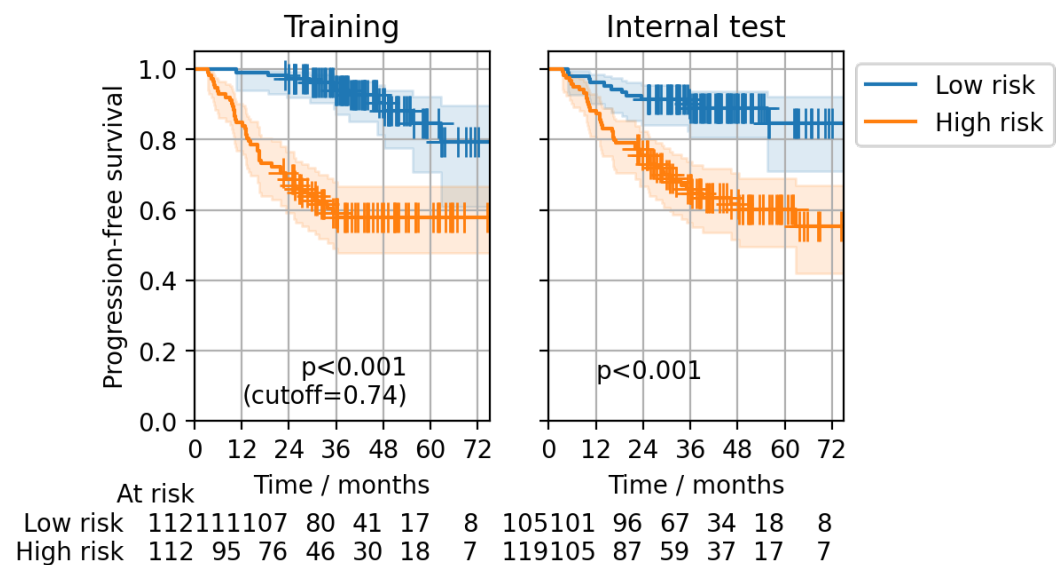

(b) Best-performing ViT: multi-outcome without auxiliary segmentation, with DenseNet branch

**Figure S5.** Gensheimer head (24 months): ensemble stratifications obtained for the best-performing CNN and ViT configurations for the training and internal test data of the HECKTOR2021 cohort. Stratifications into low (blue) and high (orange) risk groups of LRC were obtained by using the median prediction on the training data as a cutoff.  $P$ -values of the log-rank test for differences between the strata's Kaplan-Meier curves are also provided. Transparently colored regions indicate 95% confidence intervals for the estimated survival functions.



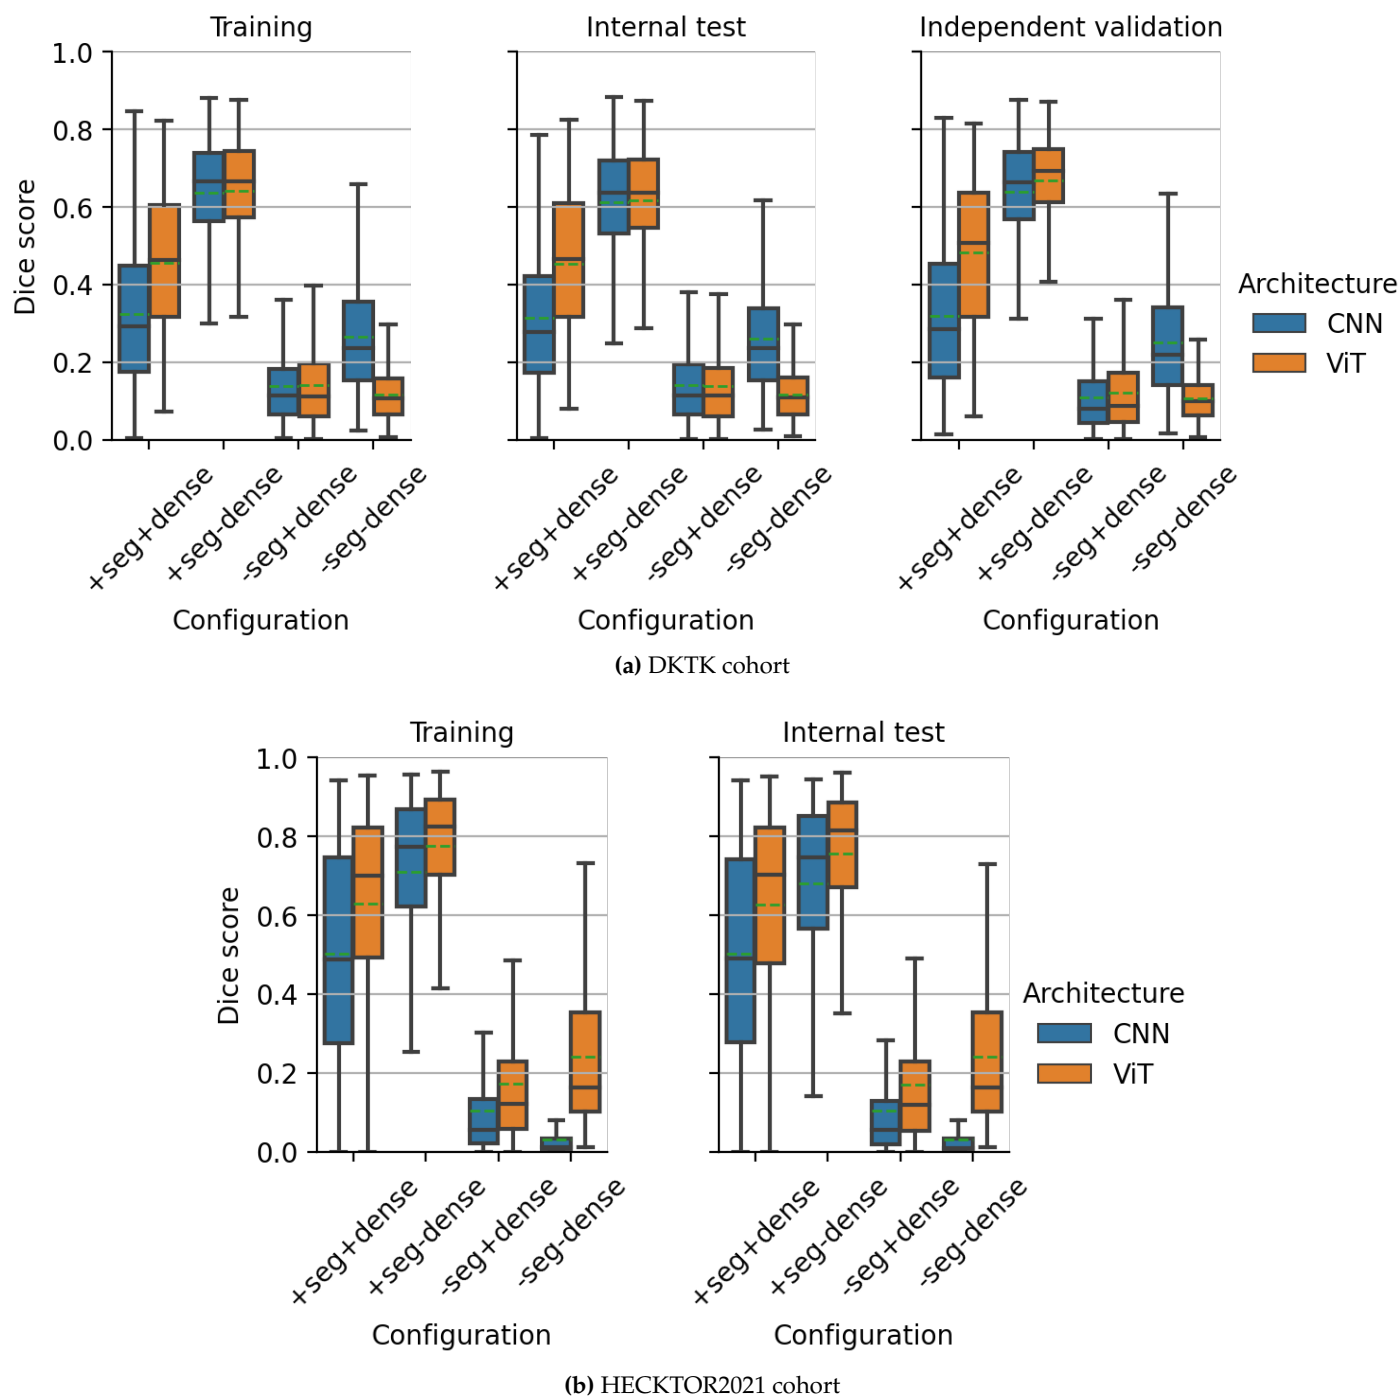

**Figure S6.** Cross-validation performance of the segmentation objective across all model configurations for multi-outcome models and both neural network architectures as measured by the Dice score. Green dashed lines denote distribution means.
